# Supplementary material for: Novel pyroptosis-associated genes signature for predicting the prognosis of sarcoma and validation
Source: Oxford University Press journal article supplement (doi:10.1042/bsr20221053), 2022-09-26
Supplement: bsr-2022-1053_supp.pdf [file bsr-2022-1053_supp.pdf]

A

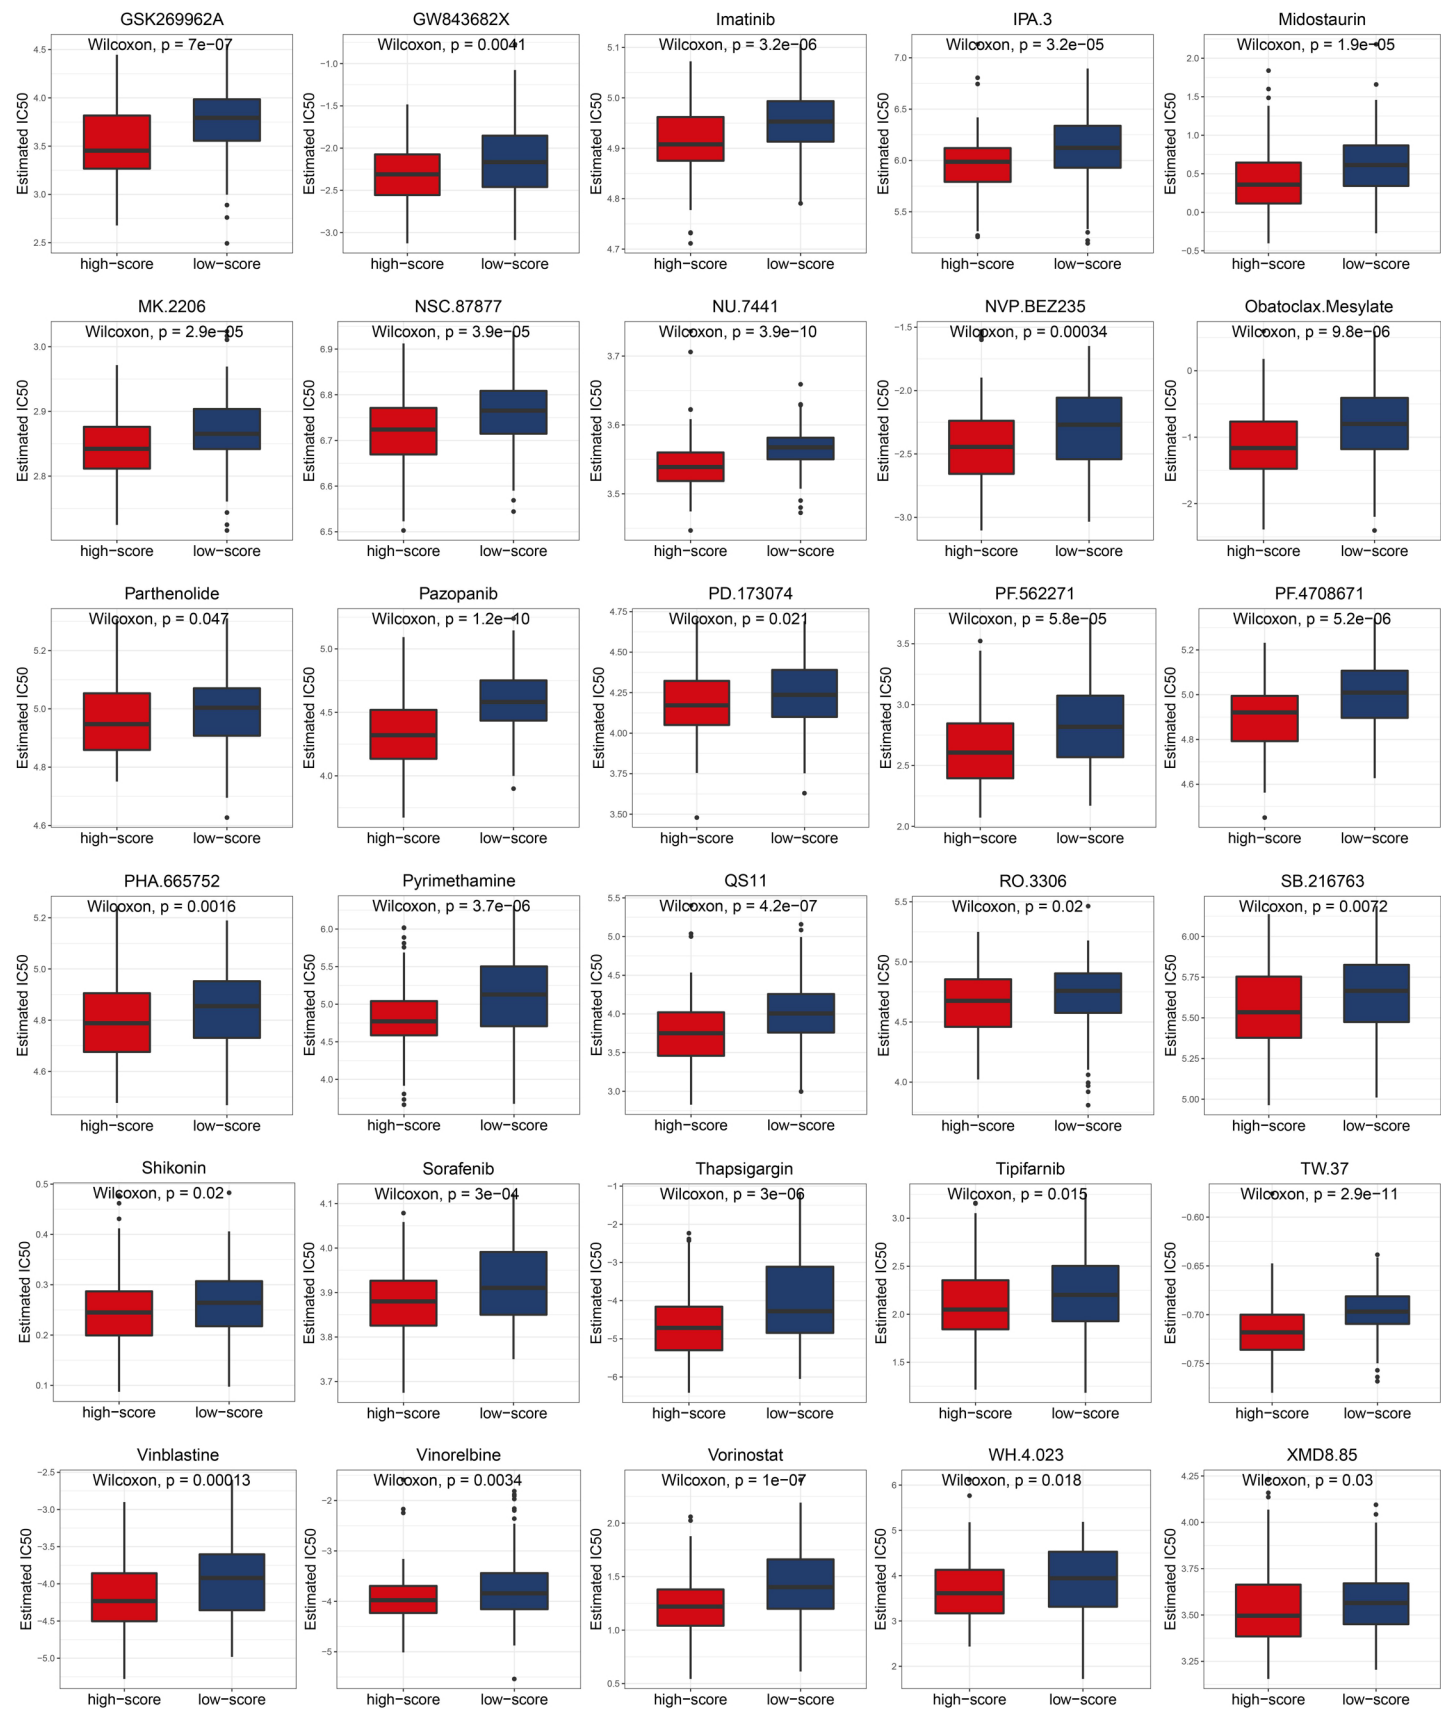

B

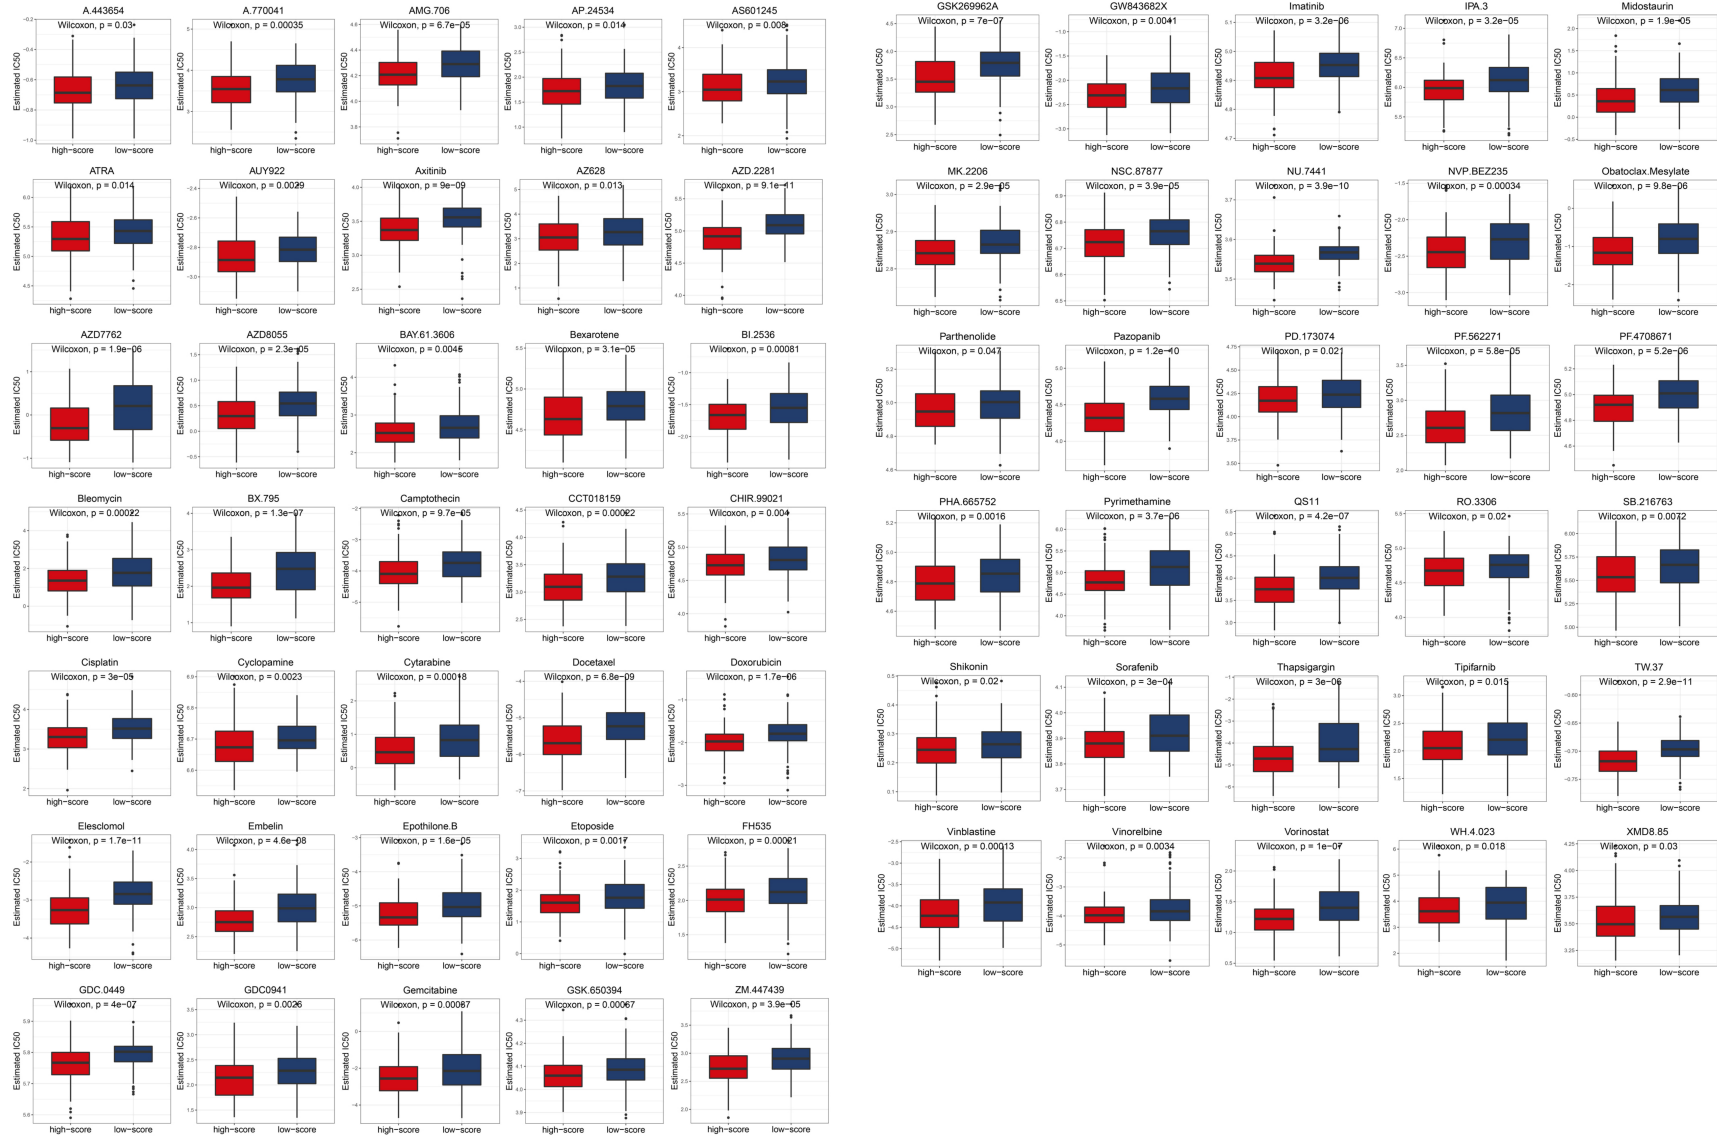

**Supplementary Figure :** **IC<sub>50</sub> values of all 79 drugs.** A. 14 drugs with low drug sensitivity of the risk group. B. 65 drugs with high drug sensitivity of the risk group.

| pmid     | TF    | characteristics                | gene                    | regulation_type                         | hallmark                                                                | original_text                                                                                                                                                                                                                                                                                                                                                                                                                                                                                                                                                                                          | title                                                                                                                                                                                           | Motif                   | Strand | Location            | p-value  | Match, Sequence        | Gene   |
|----------|-------|--------------------------------|-------------------------|-----------------------------------------|-------------------------------------------------------------------------|--------------------------------------------------------------------------------------------------------------------------------------------------------------------------------------------------------------------------------------------------------------------------------------------------------------------------------------------------------------------------------------------------------------------------------------------------------------------------------------------------------------------------------------------------------------------------------------------------------|-------------------------------------------------------------------------------------------------------------------------------------------------------------------------------------------------|-------------------------|--------|---------------------|----------|------------------------|--------|
| 28643791 | PAX7  | high expression; targeted by   | EWSR1 fusion protein    | positive                                | Ewing sarcoma                                                           | Here, using analyses of published whole-genome gene expression microarray data, we identify PAX7 as a gene with significantly increased expression in Ewing sarcoma in comparison to CIC-DUX4 round cell sarcoma. Exploring the mechanism of PAX7 expression in Ewing sarcoma using curated RNA- and ChIP-sequencing data, we demonstrate that the EWSR1 fusion protein is required for PAX7 expression in Ewing sarcoma and identify a candidate EWSR1-FLI1-bound PAX7 enhancer that coincides with both a consensus GCGAA repeat-containing binding site and a peak of regulatory H3K27 acetylation. | EWSR1 fusion proteins moderate PAX7 expression in Ewing sarcoma.                                                                                                                                | V_PAX7_01<br>G_M01338   | -      | 102557208-102557224 | 5.00E-06 | TCAAAATATAGAAAAA       | LRRC17 |
| 28008375 | SMAD3 | targeted by                    | EWSR1/FLI1              | negative                                | N/A                                                                     | SMAD3 were up-regulated and FLI1, MYB, E2F1, ETS2, WT1 were down-regulated with more than half of their targets were down-regulated after EWSR1/FLI1 knockdown.                                                                                                                                                                                                                                                                                                                                                                                                                                        | Knockdown of EWSR1/FLI1 expression alters the transcriptome of Ewing sarcoma cells in vitro.                                                                                                    | V_SMAD3_02<br>G_M011801 | -      | 127348889-127348901 | 7.00E-06 | AGCGACAGACAATC         | PODNL2 |
| 28008375 | MYB   | targeted by                    | EWSR1/FLI1              | positive                                | N/A                                                                     | SMAD3 were up-regulated and FLI1, MYB, E2F1, ETS2, WT1 were down-regulated with more than half of their targets were down-regulated after EWSR1/FLI1 knockdown.                                                                                                                                                                                                                                                                                                                                                                                                                                        | Knockdown of EWSR1/FLI1 expression alters the transcriptome of Ewing sarcoma cells in vitro.                                                                                                    | V_MYB_03<br>G_M00773    | +      | 102557023-102557033 | 2.00E-06 | TTGTCTCAGATG           | LRRC17 |
| 29773426 | SOX2  | correlate with                 | H3K27me3                | N/A                                     | synovial sarcoma                                                        | H3K27me3 immunohistochemistry of the synovial sarcoma cases revealed a high statistically significant correlation between SOX2 and H3K27me3 expression (p < .0.0005; Chi square test). Six SOX2 positive synovial sarcoma cases were analyzed by FISH using a SOX2/CEN3 dual color FISH probe. None of these cases revealed an amplification of the SOX2 gene.                                                                                                                                                                                                                                         | Stem cell transcription factor SOX2 in synovial sarcoma and other soft tissue tumors.                                                                                                           | V_SOX2_06<br>G_M01272   | +      | 102553198-102553213 | 1.00E-05 | ATTCTCTTTGTTTGTTG      | LRRC17 |
| 7828148  | CHOP  | amplification; high expression | N/A                     | N/A                                     | N/A                                                                     | We have now found CHOP amplification in two sarcoma cell lines with previously reported amplification of the nearby GLI1 gene. High constitutive expression levels of CHOP were observed in tumors with gene amplification, but also in some other samples. MDM2 and CHOP were co-amplified in two of these, whereas the two osteosarcoma lines had amplified CHOP but not MDM2. CHOP was amplified in both cell lines with GLI1 amplification, and MDM2 only in one.                                                                                                                                  | The proto-oncogene EWSR1/CREB1 fusion is involved in growth and DNA damage response, is amplified in a subset of human sarcomas.                                                                | V_CHOP_01<br>G_M00249   | +      | 102557059-102557071 | 7.00E-06 | TTGTGCAATACCTC         | LRRC17 |
| 10574952 | ATF1  | high expression                | N/A                     | N/A                                     | cell viability; synovial sarcoma                                        | The level of EWS/ATF1 expression was found to be significantly higher in primary tumor tissue than in SLCCS-1 cells or in 203T cells following induction of an EWS/ATF1 expression vector. These studies demonstrate a direct role for the EWS/ATF1 fusion protein in maintaining tumor cell viability of Clear Cell sarcoma and indicate that intracellular antibodies may be used to achieve a phenotypic knockout of tumor-related proteins as a method to explore their function.                                                                                                                  | Tumor cell viability in clear cell sarcoma requires DNA binding activity of the EWS/ATF1 fusion protein.                                                                                        | V_ATF1_06<br>G_M00691   | +      | 53342311-53342321   | 1.00E-06 | CCCTGACGTCAT           | HLF    |
| 10574952 | ATF1  | high expression                | N/A                     | N/A                                     | cell viability; synovial sarcoma                                        | The level of EWS/ATF1 expression was found to be significantly higher in primary tumor tissue than in SLCCS-1 cells or in 203T cells following induction of an EWS/ATF1 expression vector. These studies demonstrate a direct role for the EWS/ATF1 fusion protein in maintaining tumor cell viability of Clear Cell sarcoma and indicate that intracellular antibodies may be used to achieve a phenotypic knockout of tumor-related proteins as a method to explore their function.                                                                                                                  | Tumor cell viability in clear cell sarcoma requires DNA binding activity of the EWS/ATF1 fusion protein.                                                                                        | V_ATF1_04<br>G_M02618   | +      | 102553731-102553741 | 7.00E-06 | CTATGACAAAGAAA         | LRRC17 |
| 20514024 | EGR1  | regulate                       | PTEN                    | positive; promoter binding              | cell death; synovial sarcoma                                            | Moreover, we find that under these conditions phosphatase and tensin homolog deleted in chromosome 10 (PTEN) is upregulated and this occurs through direct binding of EGR1 to an element upstream of the PTEN promoter. Using a combination of gain- and loss-of-function approaches, we show that EGR1 modulation of PTEN contributes to HDAC inhibitor-induced apoptosis in synovial sarcoma. Finally, restoration of EGR1 or PTEN expression is sufficient to induce synovial sarcoma cell death.                                                                                                   | EGR1 reactivation by histone deacetylase inhibitors promotes synovial sarcoma cell death through the PTEN tumor suppressor.                                                                     | V_EGR1_06<br>G_M01873   | -      | 53342277-53342286   | 4.00E-06 | CGCGGGGCGG             | HLF    |
| 20514024 | EGR1  | regulate                       | PTEN                    | positive; promoter binding              | cell death; synovial sarcoma                                            | Moreover, we find that under these conditions phosphatase and tensin homolog deleted in chromosome 10 (PTEN) is upregulated and this occurs through direct binding of EGR1 to an element upstream of the PTEN promoter. Using a combination of gain- and loss-of-function approaches, we show that EGR1 modulation of PTEN contributes to HDAC inhibitor-induced apoptosis in synovial sarcoma. Finally, restoration of EGR1 or PTEN expression is sufficient to induce synovial sarcoma cell death.                                                                                                   | EGR1 reactivation by histone deacetylase inhibitors promotes synovial sarcoma cell death through the PTEN tumor suppressor.                                                                     | V_EGR1_06<br>G_M02744   | +      | 53342276-53342289   | 1.00E-06 | CCGCGCCCGCAGCG         | HLF    |
| 24415532 | REST  | targeted by                    | EWS-FLI1                | positive                                | tumor growth                                                            | Inhibition of EWS-FLI1 using small interfering RNA decreased REST expression in human Ewing sarcoma cells. Inhibition of REST did not affect EWS-FLI-1, but significantly suppressed tumor growth in vivo, reduced the tumor vessel pericyte markers - smooth muscle actin (SMA) and desmin, increased hypoxia and apoptosis in tumor tissues, and decreased the expression of delta-like ligand 4 (DLL4) and Hes1.                                                                                                                                                                                    | EWS-FLI1 regulates the neuronal repressor gene REST, which controls Ewing sarcoma growth and vascular morphology.                                                                               | V_REST_01<br>G_M01256   | +      | 35182303-35182324   | 1.00E-06 | CCTGGGGGCTCTCTCTGCTGCT | SCUBE3 |
| 24415532 | REST  | targeted by                    | EWS-FLI1                | positive                                | tumor growth                                                            | Inhibition of EWS-FLI1 using small interfering RNA decreased REST expression in human Ewing sarcoma cells. Inhibition of REST did not affect EWS-FLI-1, but significantly suppressed tumor growth in vivo, reduced the tumor vessel pericyte markers - smooth muscle actin (SMA) and desmin, increased hypoxia and apoptosis in tumor tissues, and decreased the expression of delta-like ligand 4 (DLL4) and Hes1.                                                                                                                                                                                    | EWS-FLI1 regulates the neuronal repressor gene REST, which controls Ewing sarcoma growth and vascular morphology.                                                                               | V_REST_02<br>G_M02256   | -      | 35182307-35182327   | 7.00E-06 | CCAGCAGACGACGACGACGCGC | SCUBE3 |
| 24415532 | REST  | regulate                       | SMA; desmin; DLL4; Hes1 | positive                                | N/A                                                                     | Inhibition of EWS-FLI1 using small interfering RNA decreased REST expression in human Ewing sarcoma cells. Inhibition of REST did not affect EWS-FLI-1, but significantly suppressed tumor growth in vivo, reduced the tumor vessel pericyte markers - smooth muscle actin (SMA) and desmin, increased hypoxia and apoptosis in tumor tissues, and decreased the expression of delta-like ligand 4 (DLL4) and Hes1.                                                                                                                                                                                    | EWS-FLI1 regulates the neuronal repressor gene REST, which controls Ewing sarcoma growth and vascular morphology.                                                                               | V_REST_01<br>G_M01256   | +      | 35182303-35182324   | 1.00E-06 | CCTGGGGGCTCTCTCTGCTGCT | SCUBE3 |
| 24415532 | REST  | regulate                       | SMA; desmin; DLL4; Hes1 | positive                                | N/A                                                                     | Inhibition of EWS-FLI1 using small interfering RNA decreased REST expression in human Ewing sarcoma cells. Inhibition of REST did not affect EWS-FLI-1, but significantly suppressed tumor growth in vivo, reduced the tumor vessel pericyte markers - smooth muscle actin (SMA) and desmin, increased hypoxia and apoptosis in tumor tissues, and decreased the expression of delta-like ligand 4 (DLL4) and Hes1.                                                                                                                                                                                    | EWS-FLI1 regulates the neuronal repressor gene REST, which controls Ewing sarcoma growth and vascular morphology.                                                                               | V_REST_02<br>G_M02256   | -      | 35182307-35182327   | 7.00E-06 | CCAGCAGACGACGACGACGCGC | SCUBE3 |
| 24069508 | REST  | interact with                  | EWS                     | N/A                                     | neuronal phenotype development; oncogenic transformation; Ewing sarcoma | Co-immunoprecipitation analysis demonstrated that EWS interacts directly with REST. Genome-wide binding analysis showed that EWS binds chromatin at or near NRSE. Furthermore, functional studies revealed that both EWS and REST inhibit neuronal phenotype development and oncogenic transformation in Ewing sarcoma cells.                                                                                                                                                                                                                                                                          | EWS and REST: Silencing Transcription Factor Inhibit Neuronal Phenotype Development and Oncogenic Transformation in Ewing Sarcoma.                                                              | V_REST_01<br>G_M01256   | +      | 35182303-35182324   | 1.00E-06 | CCTGGGGGCTCTCTCTGCTGCT | SCUBE3 |
| 24069508 | REST  | interact with                  | EWS                     | N/A                                     | neuronal phenotype development; oncogenic transformation; Ewing sarcoma | Co-immunoprecipitation analysis demonstrated that EWS interacts directly with REST. Genome-wide binding analysis showed that EWS binds chromatin at or near NRSE. Furthermore, functional studies revealed that both EWS and REST inhibit neuronal phenotype development and oncogenic transformation in Ewing sarcoma cells.                                                                                                                                                                                                                                                                          | EWS and REST: Silencing Transcription Factor Inhibit Neuronal Phenotype Development and Oncogenic Transformation in Ewing Sarcoma.                                                              | V_REST_02<br>G_M02256   | -      | 35182307-35182327   | 7.00E-06 | CCAGCAGACGACGACGACGCGC | SCUBE3 |
| 24043308 | GLI1  | regulate                       | KRT17                   | positive                                | cellular adhesion; oncogenic transformation                             | In this work, we identify keratin 17 (KRT17) as a direct downstream target gene upregulated by GLI1. We demonstrate that KRT17 regulates cellular adhesion by activating AKT/PKB (protein kinase B) signaling. In addition, KRT17 is necessary for oncogenic transformation in Ewing sarcoma and accounts for much of the GLI1-mediated transformation function but via a mechanism independent of AKT signaling.                                                                                                                                                                                      | A novel role for keratin 17 in coordinating oncogenic transformation and cellular adhesion in Ewing sarcoma.                                                                                    | V_GLI1_01<br>G_M01702   | -      | 102556953-102556963 | 6.00E-06 | GGCGACCCAAAG           | LRRC17 |
| 11973649 | ETS1  | targeted by                    | PARP-1                  | negative                                | N/A                                                                     | Previously, we cloned the PARP gene promoter region from EWS cells, showed that it contains multiple ETS-binding sites and demonstrated a positive regulation of PARP by ETS1. Results show that stable down-regulation of ETS1 increases the resistance of EWS cells to various genotoxic agents, whereas down-regulation of EWS/FLI-1 has pro-apoptotic effects. Because down-regulation EWS/FLI-1 does not dramatically change PARP levels, these results suggest a direct effect for EWS/FLI-1 in the DNA damage response of EWS cells.                                                            | Differential regulation of ETS1 response to DNA damage in Ewing's sarcoma cells. ETS1 and EWS/FLI-1.                                                                                            | V_ETS1_B_0<br>G_M00339  | -      | 102549332-102549346 | 0        | CCAGGAAGTGTTATC        | LRRC17 |
| 30219084 | ATF1  | EWSR1-ATF1 fusion              | N/A                     | N/A                                     | N/A                                                                     | These cases most likely had EWSR1-ATF1 and EWSR1-CREB1 fusions, respectively. RT-PCR was performed in 8 available cases, including 6 CCSBs and 2 CCSLGTs. All CCSBs showed EWSR1-ATF1 fusions. Among the 2 CCSLGT cases, one had EWSR1-ATF1 fusion and the other had EWSR1-CREB1 fusion.                                                                                                                                                                                                                                                                                                               | Detection of specific gene rearrangements by fluorescence in situ hybridization in 10 cases of clear cell sarcoma of soft tissue and 6 cases of clear cell sarcoma-like gastrointestinal tumor. | V_ATF1_06<br>G_M00691   | +      | 53342311-53342321   | 1.00E-06 | CCCTGACGTCAT           | HLF    |
| 30219084 | ATF1  | EWSR1-ATF1 fusion              | N/A                     | N/A                                     | N/A                                                                     | These cases most likely had EWSR1-ATF1 and EWSR1-CREB1 fusions, respectively. RT-PCR was performed in 8 available cases, including 6 CCSBs and 2 CCSLGTs. All CCSBs showed EWSR1-ATF1 fusions. Among the 2 CCSLGT cases, one had EWSR1-ATF1 fusion and the other had EWSR1-CREB1 fusion.                                                                                                                                                                                                                                                                                                               | Detection of specific gene rearrangements by fluorescence in situ hybridization in 10 cases of clear cell sarcoma of soft tissue and 6 cases of clear cell sarcoma-like gastrointestinal tumor. | V_ATF1_04<br>G_M02842   | +      | 102553731-102553744 | 7.00E-06 | CTATGACAAAGAAA         | LRRC17 |
| 16463269 | STAT3 | N/A                            | N/A                     | N/A                                     | Ewing sarcoma family of tumours                                         | In conclusion, STAT3 activation is present in approximately half of ESFT and correlates with clinical features. The role of STAT3 activation in ESFT pathogenesis seems to be independent of the type of EWS/ETS translocation.                                                                                                                                                                                                                                                                                                                                                                        | STAT3 is activated in a subset of the Ewing sarcoma family of tumours.                                                                                                                          | V_STAT3_03<br>G_M01595  | -      | 127351434-127351449 | 4.00E-06 | CATTCCAGGAAGAAAA       | PODNL2 |
| 23185447 | ETS   | regulate                       | KCNK2                   | negative                                | Ewing's sarcoma                                                         | Conversely, KCNK2 was found underexpressed in ESFT relative to AHMS, suggesting that the EWSR1-ETS oncoprotein may have the opposite effect of ERG rearrangements in PCa.                                                                                                                                                                                                                                                                                                                                                                                                                              | Potential downstream target genes of aberrant ETS transcription factors are differentially affected in Ewing's sarcoma and prostate carcinoma.                                                  | V_ETS_B_M00340          | -      | 102549334-102549347 | 6.00E-06 | GGCAGGAAATGTGGTT       | LRRC17 |
| 23185447 | ETS   | regulate                       | KCNK2                   | negative                                | Ewing's sarcoma                                                         | Conversely, KCNK2 was found underexpressed in ESFT relative to AHMS, suggesting that the EWSR1-ETS oncoprotein may have the opposite effect of ERG rearrangements in PCa.                                                                                                                                                                                                                                                                                                                                                                                                                              | Potential downstream target genes of aberrant ETS transcription factors are differentially affected in Ewing's sarcoma and prostate carcinoma.                                                  | V_ETS_G4<br>G_M00771    | +      | 102549334-102549345 | 0        | AACCACTCTGTC           | LRRC17 |
| 23995784 | FOXO1 | targeted by                    | EWS-FLI1                | negative; EWS-FLI1-suppressed regulator | decrease in ES tumor growth                                             | In addition to FOXO1 regulation by direct promoter binding of EWS-FLI1, its subcellular localization and activity is regulated by cyclin-dependent kinase 2- and AKT-mediated phosphorylation downstream of EWS-FLI1. Restoration of nuclear FOXO1 expression in ES cells impaired proliferation and significantly reduced clonogenicity. Gene-expression profiling revealed a significant overlap between EWS-FLI1-repressed and FOXO1-activated genes.                                                                                                                                               | Suppression of FOXO1 is responsible for a growth regulatory repressive transcriptional sub-signature of EWS-FLI1 in Ewing sarcoma.                                                              | V_FOXO1_Q3<br>G_M01216  | -      | 102557196-102557204 | 8.00E-06 | AAAAACAAT              | LRRC17 |
| 23995784 | FOXO1 | targeted by                    | EWS-FLI1                | negative; EWS-FLI1-suppressed regulator | decrease in ES tumor growth                                             | In addition to FOXO1 regulation by direct promoter binding of EWS-FLI1, its subcellular localization and activity is regulated by cyclin-dependent kinase 2- and AKT-mediated phosphorylation downstream of EWS-FLI1. Restoration of nuclear FOXO1 expression in ES cells impaired proliferation and significantly reduced clonogenicity. Gene-expression profiling revealed a significant overlap between EWS-FLI1-repressed and FOXO1-activated genes.                                                                                                                                               | Suppression of FOXO1 is responsible for a growth regulatory repressive transcriptional sub-signature of EWS-FLI1 in Ewing sarcoma.                                                              | V_FOXO1_B<br>G_M00473   | -      | 35185862-35185891   | 3.00E-06 | AAAAACAAT              | SCUBE3 |



**Supplementary Table :** transcription factor motifs of seven genes.
